# Supplementary material
Source: PubMed Central journal article supplement (PMC1698842)

**Supplementary Figure 1. VEGF mRNA expression in the diabetic wounds.**

Real-time RT-PCR analysis of mouse VEGF mRNA levels during wound healing showing that VEGF induction is strikingly decreased in diabetic mice compared with healthy controls. Results are expressed as relative fold induction versus VEGF mRNA levels at day 0 (n=3) P value: \* < 0.05; \*\*\* < 0.005.

# Supplementary figure

## VEGF mRNA

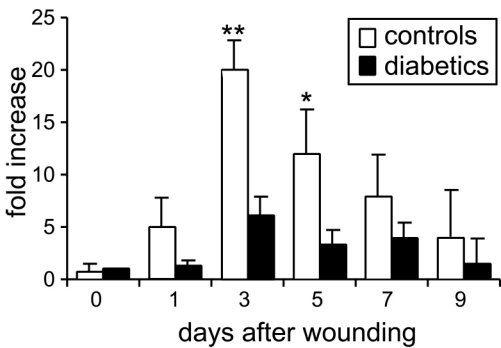

Supplement: amjpathol_169_4_1167__1.pdf [file amjpathol_169_4_1167__1.pdf]
